# Supplementary material for: High resolution time series reveals cohesive but short-lived communities in coastal plankton
Source: Nat Commun. 2018 Jan 18;9:266. doi: 10.1038/s41467-017-02571-4 (PMC5773528; doi:10.1038/s41467-017-02571-4)
Supplement: Supplementary file 10 — Supplementary Data 7 [file 41467_2017_2571_MOESM10_ESM.xlsx]

## Sheet: Sheet1
OrdinalDay	AirTemp_[C]_@Nahant	Ammonium_[uM]_@Nahant	AtmPressure_[24hrAVG_hPa]_@Buoy44013	ChlorophyllConc_[24hrAVG_ug/L]_@Buoy44013	DomWavePd_[24hrAVG_sec]_@Buoy44013	Macroalgae_@Nahant	Nitrite+Nitrate_[uM]_@Nahant	Phosphate_[uM]_@Nahant	Salinity_[PPT]_@Nahant	Silicate_[uM]_@Nahant	TidalDirection_@Boston8443970	WaterLevel_[m]_@Boston8443970	WaterTemp_[C]_@Nahant	WaveHeight_[24hrAVG_m]_@Buoy44013	WindSpeed_[24hrAVG_m/s]_@Buoy44013
204	26	0.6	1013.7	3.2	5.87	0	0	0.1	33.83	4	0	3.595	18	0.36	3.7
205	27	0.1	1012	4	6.25	3	0	0.1	33.54	3.9	0	3.876	17.5	0.36	2.7
206	nd	0.4	1008.3	4	5.77	0	0.6	0.2	33.24	4.2	1	4.019	nd	0.43	4.4
207	21	0.3	1009	3.7	5.97	0	0.6	0.1	32.94	3.9	1	3.645	20	0.48	5.5
208	26	0.3	1013.6	3.9	6.12	0	0	0.1	33.83	3.5	1	3.34	17	0.37	4.6
209	29	0.6	1016.1	3.4	nd	0	0	0	33.83	3.1	1	3.018	20	0.2	3.2
210	23	0.3	1011.1	4.6	3.39	0	0.2	0.1	33.83	3.3	1	2.845	15	0.6	6.5
211	24	0.4	1010.5	4.1	3.51	0	0.3	0	33.54	3.2	1	2.434	17	0.37	4.4
212	23	0.8	1013.4	4	3.6	0	0.3	0.1	33.83	3.5	1	2.134	17.5	0.43	5
213	nd	0.5	1016.8	4	4.26	3	6.2	0.2	33.24	5.7	1	1.898	19	0.36	3.6
214	23.5	0	1020.4	4	5.94	0	0.8	0	nd	2.9	1	1.704	18.3	0.49	4.4
215	26.5	0.5	1019.6	4.7	7.43	0	0.6	0.1	33.83	2.4	1	1.614	13.5	0.61	5.5
216	27	0.2	1014.4	5.2	4.86	0	1.2	0	34.42	6.2	0	1.712	10.9	0.71	6.2
217	24.5	0.8	1007.2	4.7	7.2	0	2.4	0.3	nd	6.3	0	2.114	10.7	0.47	4.1
218	28.7	0.7	1001.6	5.8	8.44	0	3	0.2	33.83	4.5	0	2.422	13.5	0.34	4.8
219	24.2	0.8	1008.5	6.5	6.48	0	1.8	0.2	34.42	4.7	0	3.093	11.2	0.51	3.7
220	26.3	0.5	1015.9	5.5	8.51	0	1.7	0.3	34.42	4.2	0	3.612	11	0.46	3.1
221	26.4	0	1016.4	5.6	7.5	0	0	0	33.83	4	0	4.039	12.8	0.6	4.4
222	25.6	0.2	1012.8	5.1	8.01	3	0.3	0.1	nd	3.7	1	4.245	13.8	0.56	3.7
223	20.6	0.3	1011.1	5	8.35	3	1.4	0	nd	3.5	1	4.084	15.7	0.47	3.1
224	25	1	1013.1	5	6.81	1	0.9	0	33.83	2.7	1	3.472	18.2	0.41	2.5
225	22	0.7	1016.8	5.2	5.26	0	0.3	0.1	34.42	1.4	1	3.311	19.5	0.43	3.6
226	23.2	1.4	1020.8	5.3	6.08	0	0.6	0	33.83	0.8	1	2.121	18.7	0.53	2.3
227	26.5	0.6	1020.6	6.2	7.71	0	0	0	33.24	3.9	1	2.023	18.3	0.65	3.7
228	21.4	0.2	1017.7	6	9.12	0	1.5	0	33.83	4.4	1	1.545	17.7	0.95	5.1
229	30.2	0.1	1014.6	6.1	9.68	3	2.4	0.2	34.42	3.2	1	1.41	14.8	1.03	3.8
230	22	0.5	1016.3	5.5	9.8	0	5.1	0	33.83	2.5	0	1.655	16.8	0.75	2.6
231	25.7	0.1	1015.3	5.5	8.86	3	0	0	34.42	2.6	0	2.307	18.7	0.48	2.4
232	25.7	0.7	1010.4	5.9	7.09	3	6.7	0	33.83	1	0	3.011	20.7	0.43	4.3
233	20.3	0.7	1015.9	5.2	7.04	1	6.7	0.1	34.42	3.1	0	3.03	19.3	0.39	2.7
234	20.1	0.1	1018.3	5.6	6.58	2	7.4	0	33.83	2.8	0	3.662	18.7	0.45	4.2
235	17.4	0	1015.8	8	6.06	4	1.3	0	33.83	2.4	0	4.113	18.7	1.35	8.2
236	17.7	0.3	1015.8	10.3	9.01	4	0	0.1	34.42	3.9	1	4.178	17.6	3.18	10.7
237	nd	0.5	1014.4	9.9	8.98	4	1.7	0.3	32.06	2.8	1	4.255	17.5	2.69	9.6
238	23	0.2	1008.1	9.4	8.74	4	3.9	0.3	34.42	5.3	1	3.6	17.8	1.85	5.4
239	21.3	0	1013.7	6.4	9.1	2	1.2	0	33.83	7.6	1	3.353	17.8	0.81	4.9
240	23	0	1018.6	6.6	9.72	2	0.9	0.1	33.83	6.7	1	3.273	18	0.43	3.3
241	28.9	0.3	1019.9	6.8	12.85	2	5.3	0.2	33.83	8	1	3.03	18.6	0.51	4.1
242	28.3	0	1019	5.7	12.47	2	2.4	0.1	33.83	8.1	1	2.522	20	0.63	3.5
243	31.8	0.4	1018.4	5.6	13.55	4	1.6	0.2	33.83	7.7	1	2.343	20	0.72	3.1
244	27.5	0.7	1016.1	5.4	11.75	3	1.3	0	nd	4.9	1	1.839	20	0.92	2.9
245	31	0.5	1014.5	5.5	11.38	1	2.2	0.2	34.42	4.1	1	1.749	20.8	0.58	3.5
246	25.3	0.6	1012.4	5.3	12.55	0	0.8	0.1	33.83	7.1	0	2.116	17.1	0.58	4.1
247	24.8	0.7	998.9	6.6	9.99	2	0.4	0.2	33.83	5.2	0	2.046	19.6	0.94	6.9
248	22.4	1.3	1004.8	6.6	9.6	0	2.9	0.2	34.42	8.9	0	2.831	16.2	0.97	8.7
249	25.7	0	1017.1	6.2	8.19	0	0	0	34.42	8.8	0	3.672	15.3	0.45	4.8
250	22.1	0.2	1021.2	6.8	4.44	0	2.1	0.2	nd	7.3	0	4.289	15.2	0.46	5.5
251	24.6	0.4	1013	6.8	3.13	1	6.3	0.5	35.01	7.9	0	4.509	13.8	0.52	5.3
252	21.8	0	1004.1	6.3	3.15	0	0	0	34.42	3.4	1	4.808	16.1	0.46	6
253	18.4	0.1	1004.8	6.7	3.4	1	12	0.2	33.83	8.6	1	4.353	14.6	0.5	7.3
254	20.1	0	1011	7.2	4.4	2	6	0	33.83	3.5	1	4.175	15.6	0.56	4.7
255	16.5	0.7	1017.9	7.7	5.72	0	2.2	0	34.42	2.4	1	2.777	15.2	0.68	5
256	18.5	0	1018.3	7.7	5.75	3	1.3	0	34.42	2	1	2.443	16	0.88	3.8
257	20.8	0.2	1012.4	7.4	7.61	3	8.8	0	34.42	5.1	1	1.669	16.1	0.76	4.9
258	18.1	1	1011.9	6.4	6.42	1	16.1	0.2	34.42	7.3	1	1.687	16.6	0.69	5.5
259	19.7	1.4	1018.3	6.8	5.05	2	1.6	0.2	35.01	7.8	0	1.641	14.9	0.6	6
260	15.6	0.8	1010.9	8.3	7.19	0	2.5	0.2	nd	4.4	0	2.319	15	0.79	7.3
261	19	0	1019.4	8.6	7.63	0	0.8	0.1	34.42	4.3	0	2.31	16.3	0.9	4
262	19.5	0	1021.7	7.1	13.49	0	1.3	0.1	34.42	4.9	0	3.153	16	0.76	3.6
263	16.5	0	1015.7	6.7	14.71	1	0	0	34.42	2.4	0	3.769	16.4	1.01	5.1
264	17	0	1016.7	8.7	13.81	3	0.8	0	35.01	4.3	0	3.935	16.2	1.35	7.3
265	24.4	0.1	1016.9	8.2	9.73	0	1	0.1	34.42	5.1	1	3.94	16	1	7.1
266	21.6	0.1	1016.3	7	11.01	0	2.4	0.2	34.42	5.4	1	4.007	16.8	0.43	3.5
267	22.8	0	1021.8	6.8	7.76	0	0	0.1	35.01	3.3	1	4.163	15.7	0.45	5
268	24.5	0	1010.1	6.2	3.29	0	0.2	0.1	34.42	3.6	1	4.103	15.5	0.66	6.5
269	19.6	0	1011.9	4.2	7.74	3	0.4	0	34.42	2.4	1	3.286	15.6	0.33	3.5
270	15.7	0	1021.2	5.3	6.09	3	0.6	0	34.42	1.8	1	3.131	15.8	1.56	7.8
271	22.8	0	1015.5	5	6.39	0	0.3	0.1	34.42	3	1	3.342	16.1	1.02	4.4
272	23.3	0.8	1009.8	5.2	5.83	1	0.2	0.1	nd	3	1	2.465	15.7	0.95	5.9
273	20.4	0	1014.2	3.9	7.38	2	4	0	34.42	4	1	2.177	16.6	0.55	3.9
274	24.1	0	1007.9	6.1	4.73	2	4.8	0.4	34.42	9	1	1.749	13.4	1.18	8.8
275	16.3	0.5	1004.2	8	5.48	2	3.4	0	36.79	6.1	1	1.539	14.7	1.3	8.5
276	12.9	0	1017.5	6.2	8.24	2	2	0.2	35.01	4.7	0	2.294	14.3	1.02	5.9
277	12.9	0	1021.7	9.4	6.9	2	0	0	34.42	2.5	0	2.35	14	2.27	11.2
278	13.9	0	1018.9	11.8	8.6	3	2.8	0	34.42	2.5	0	3.632	14	3.07	11.2
279	16	0.6	1017.2	8.1	7.58	3	3.4	0.3	34.42	3.1	0	4.38	14.9	1.95	8.1
280	12.4	0.3	1002.8	7.5	8.33	2	1.1	0.1	34.42	3.8	1	4.829	14.7	2.06	8.4
281	16	0.6	1004.5	7.1	5.12	2	0.8	0	35.01	3.8	1	4.464	15	0.83	9.1
282	15.1	0.3	1007.1	7.6	2.94	0	4	0.4	33.83	7.2	1	4.042	14.7	0.5	6.7
283	15.8	0.3	1012	7.9	3.74	1	0.6	0	34.42	4.9	1	4.239	14.9	0.89	9
284	19.3	1.7	1005.9	6	3.23	0	4.7	0.4	34.42	7.6	1	3.539	nd	0.41	5.7
285	13.2	0.8	1007.9	6.6	7.12	0	21.7	0.6	33.83	10.5	1	2.568	14.4	0.38	4.1
286	13.5	0.3	1011.6	7.5	4.12	3	5.3	0.3	34.42	6	1	2.102	14.2	0.71	6
287	15.2	0.5	1016.3	5.6	5.06	0	2.2	0.3	34.42	5	1	1.711	14	0.47	4
288	10	0.5	1001.9	8.4	5.16	0	1.3	0.3	33.83	4.7	0	2.427	13.9	1.34	9.4
289	11.5	0.4	990.6	7.2	8.74	0	3.5	0.4	34.42	6.9	0	2.071	13	1.9	14
290	12.8	0.4	1005.5	6.5	6.75	0	3.4	0.3	34.42	8.4	0	2.157	12.9	1.46	11.2
291	10	1.1	1007.6	5.7	7.27	1	6.6	0.7	35.01	7.2	0	3.296	11.8	0.69	7.5
292	9.1	0	1011.5	6.4	3.04	1	3.7	0.2	34.72	7.6	0	3.445	11.6	0.49	5.8
293	13.7	0.3	1012.7	5.6	nd	0	1.5	0	34.42	6	0	3.676	12.3	0.26	4
294	13.7	0.4	1007.5	6	6.97	2	1.6	0	34.42	6.1	0	4.203	12	0.46	4.9
295	9.7	0.3	1004	7.5	3.78	0	1.4	0	34.42	6.3	0	3.951	11.4	0.95	9.9
296	8.7	0.3	1013.9	7.9	3.83	1	3.7	0.3	35.01	7.1	1	3.957	11.2	0.98	10.8
